# Supplementary material
Source: PubMed Central journal article supplement (PMC2577058)

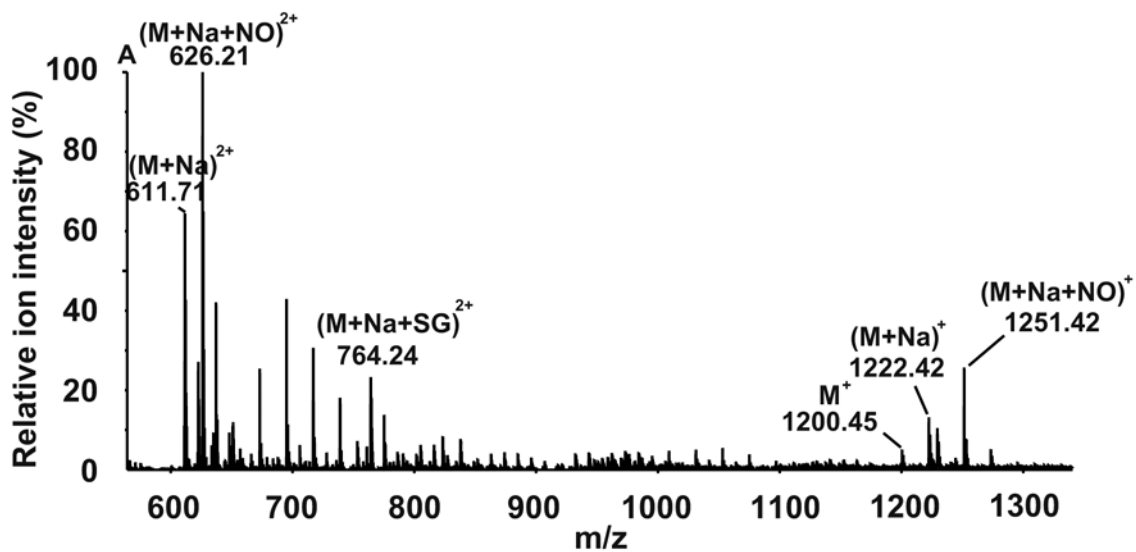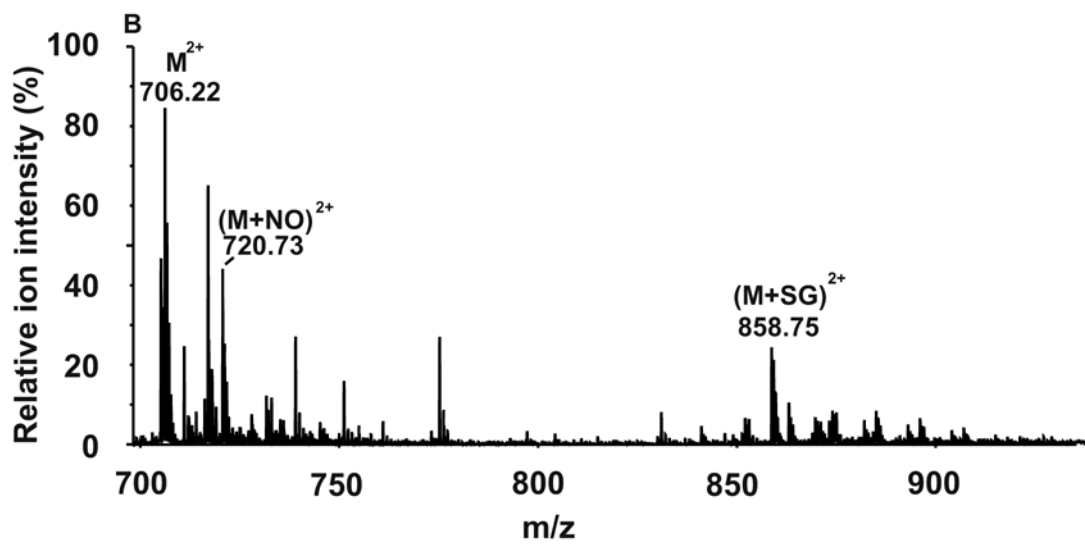

Supplement: NIHMS70267-supplement-01.pdf [file NIHMS70267-supplement-01.pdf]

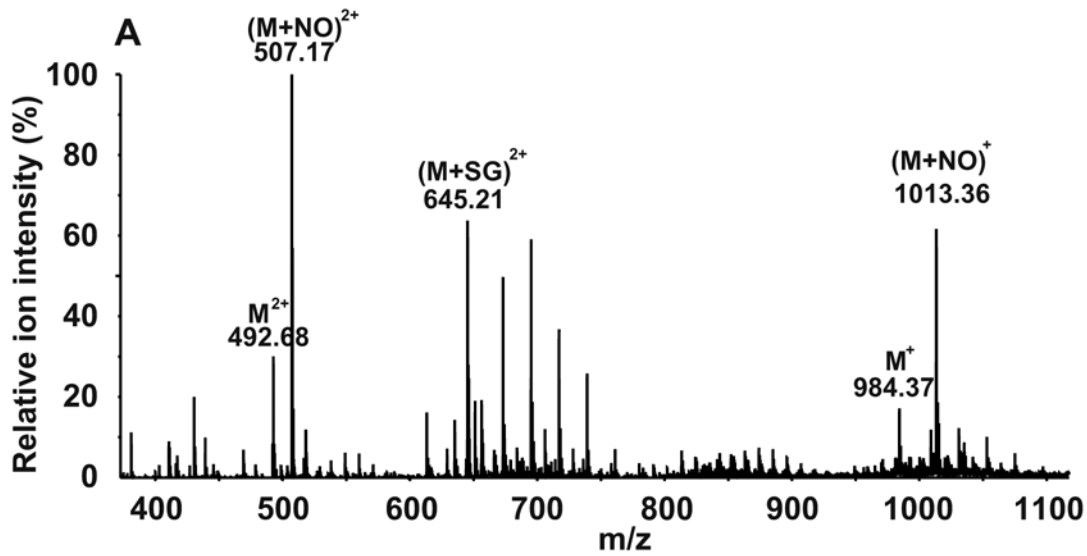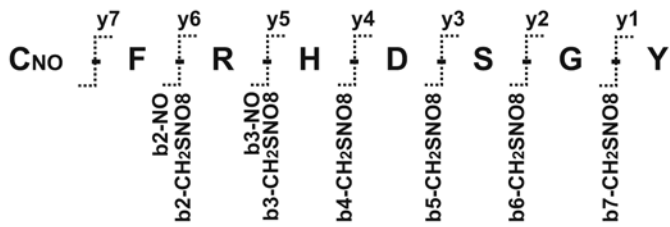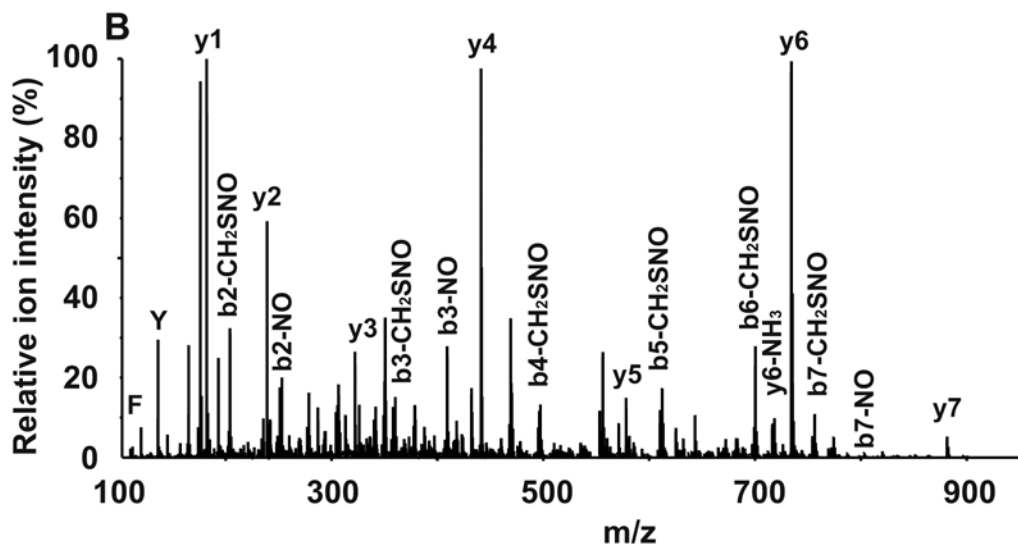

Supplement: NIHMS70267-supplement-02.pdf [file NIHMS70267-supplement-02.pdf]

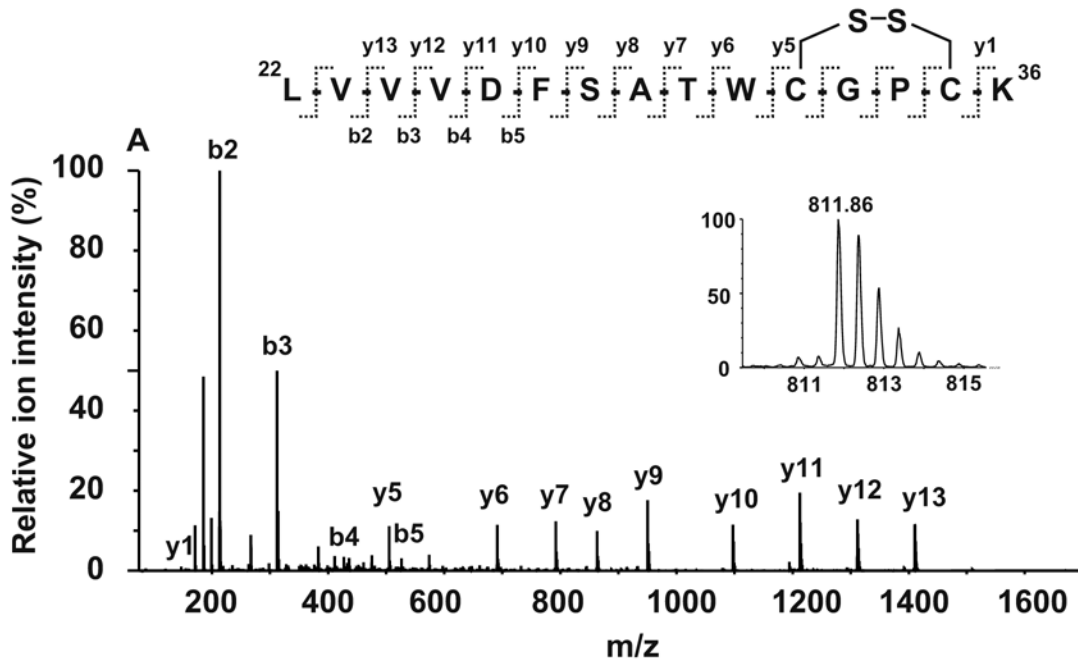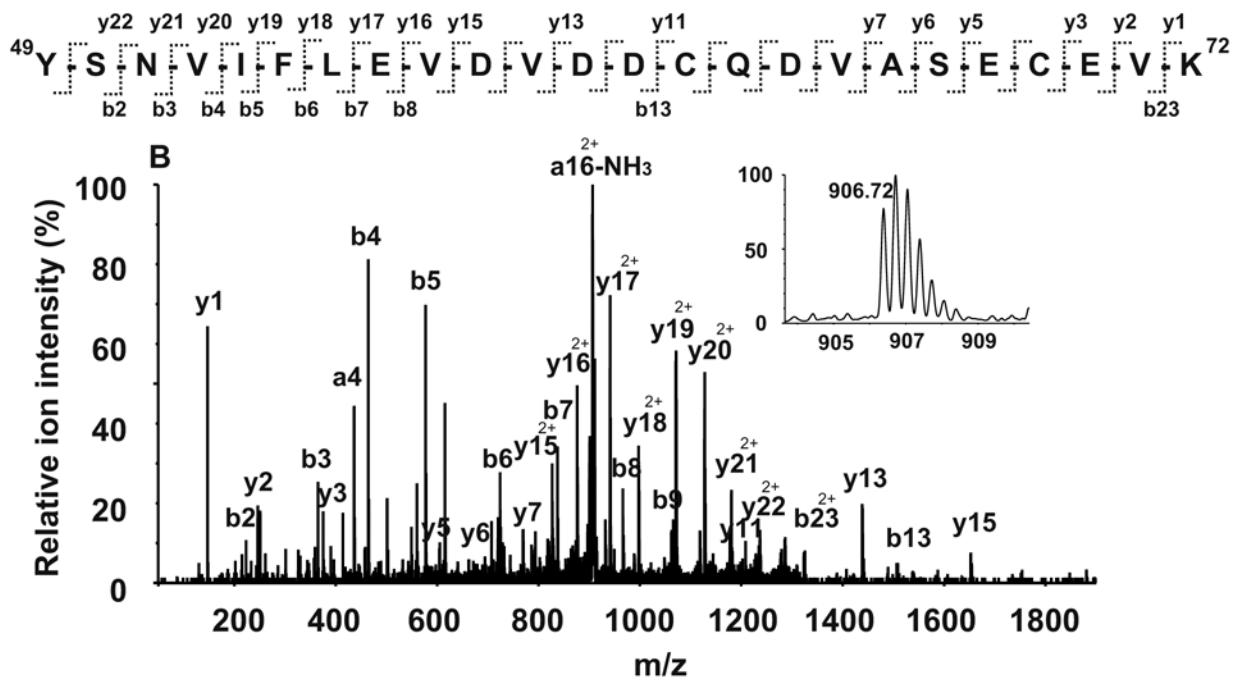

Supplemental Figure 1

Supplement: NIHMS70267-supplement-03.pdf [file NIHMS70267-supplement-03.pdf]
